# Supplementary material for: α-Amylase immobilization on amidoximated acrylic microfibres activated by cyanuric chloride
Source: PubMed Central journal article supplement (PMC6281920; doi:10.1098/rsos.172164), 2018-11-28
Supplement: rsos172164supp4.pdf [file rsos172164supp4.pdf]

## A-Amylase immobilization on amidoximated acrylic microfibers activated by cyanuric chloride

Yaaser Q. Almulaiky<sup>1,2</sup>, Faisal M. Aqlan<sup>3</sup>, Musab Aldhahri<sup>4,5</sup>, Mohammed Baeshen<sup>6</sup> Tariq Jamal Khan<sup>7</sup>, Khalid A. Khan<sup>8</sup>, Mohamed Afifi<sup>6,9</sup>, Ammar AL-Farga<sup>1</sup>, Mohiuddin Khan Warsi<sup>1</sup>, Mohammed Alkaled<sup>6</sup>, Aisha A.M. Alayafi<sup>6</sup>

<sup>1</sup>Department of Biochemistry, Faculty of Science, University of Jeddah, Jeddah, Saudi Arabia

<sup>2</sup>Chemistry Department, Faculty of Applied Science, Taiz University, Taiz, Yemen

<sup>3</sup>Chemistry Department, Faculty of Science, University of Jeddah, Jeddah, Saudi Arabia

<sup>4</sup>Department of Biochemistry, Faculty of Science, King Abdulaziz University, Jeddah, Saudi Arabia

<sup>5</sup>Center of Nanotechnology, King Abdulaziz University, Jeddah, Saudi Arabia

<sup>6</sup>Department of biology, Faculty of Science, University of Jeddah, Jeddah, Saudi Arabia

<sup>7</sup>Stem Cell P2 Laboratory, The Center for Reproductive Medicine, Shantou University Medical College, Shantou, 515041, People's Republic of China

<sup>8</sup>Chemistry Department, Faculty of Science, King Abdulaziz University, Jeddah, Saudi Arabia

<sup>9</sup>Biochemistry Department, Faculty of Veterinary Medicine, Zagazig University, Egypt

### Supplementary Figure 5a

| pH  | Soluble enzyme Residual activity % | OD at 560 nm (n/3) | Immobilized enzyme Residual activity % | OD at 560 nm (n/3) |
|-----|------------------------------------|--------------------|----------------------------------------|--------------------|
| 4.5 | 27                                 | 0.276              | 41                                     | 0.269              |
| 5   | 45                                 | 0.455              | 53                                     | 0.348              |
| 5.5 | 81                                 | 0.823              | 75                                     | 0.493              |
| 6   | 100                                | 1.015              | 86                                     | 0.565              |
| 6.5 | 90                                 | 0.913              | 100                                    | 0.658              |
| 7   | 77                                 | 0.781              | 85                                     | 0.559              |
| 7.5 | 38                                 | 0.385              | 68                                     | 0.447              |
| 8   | 29                                 | 0.294              | 47                                     | 0.309              |
| 8.5 | 21                                 | 0.213              | 39                                     | 0.256              |
| 9   | 17                                 | 0.176              | 23                                     | 0.151              |

**Supplementary Figure 5a Optimum pH (a)**, Free and immobilized enzyme activity was determined at various pH using different buffers, sodium acetate (pH 4.0-6.0) and Tris-HCl (6.5-9) at 50 mM concentration. the assay was performed as described in  $\alpha$ -amylase assay. The maximum activity was taken as 100% and % relative activity was plotted against different pH values.

### Supplementary Figure 5b

| Temperature<br>C <sup>0</sup> | Soluble enzyme<br>Residual activity % |                    | Immobilized<br>enzyme Residual<br>activity % |                    |
|-------------------------------|---------------------------------------|--------------------|----------------------------------------------|--------------------|
|                               | %                                     | OD at<br>560 (n/3) | %                                            | OD at<br>560 (n/3) |
| 30                            | 33                                    | 0.428              | 39                                           | 0.289              |
| 40                            | 51                                    | 0.661              | 64                                           | 0.475              |
| 50                            | 100                                   | 1.297              | 88                                           | 0.654              |
| 60                            | 81                                    | 1.051              | 100                                          | 0.743              |
| 70                            | 74                                    | 0.959              | 84                                           | 0.624              |
| 80                            | 42                                    | 0.544              | 65                                           | 0.483              |

**Supplementary Figure 5b Effect of temperature.** Free and immobilized enzyme activity was determined at a temperature range of 20-80°C. The assay was performed as described in  $\alpha$  – amylase assay, except at different temperature as mentioned above. The maximum activity was taken as 100% and % relative activity was plotted against different temperatures.

### Supplementary Figure 5c

| Temperature<br>C <sup>0</sup> | Soluble enzyme<br>Residual activity % |                    | Immobilized<br>enzyme Residual<br>activity % |                    |
|-------------------------------|---------------------------------------|--------------------|----------------------------------------------|--------------------|
|                               | %                                     | OD at<br>560 (n/3) | %                                            | OD at<br>560 (n/3) |
| 30                            | 100                                   | 1.293              | 100                                          | 0.747              |
| 40                            | 100                                   | 1.291              | 100                                          | 0.756              |
| 50                            | 100                                   | 1.295              | 100                                          | 0.750              |
| 60                            | 81                                    | 1.045              | 100                                          | 0.753              |
| 70                            | 74                                    | 0.955              | 84                                           | 0.635              |
| 80                            | 42                                    | 0.542              | 65                                           | 0.489              |

**Supplementary Figure 5c, thermal stability (c).** Free and immobilized enzyme activity was determined at a temperature range of 20-80°C for 30 min prior to substrate addition. The assay was performed as described in  $\alpha$ -amylase assay. The maximum activity was taken as 100% and % relative activity was plotted against different temperatures.

### Supplementary Figure 5d

| Starch 1%        |             | Soluble enzyme<br>Residual activity<br>% | Immobilized<br>enzyme<br>Residual<br>activity % |
|------------------|-------------|------------------------------------------|-------------------------------------------------|
| Volume           | 1/S<br>(mg) | 1/V ( $\mu\text{mol}/\text{min}$ )       | 1/V<br>( $\mu\text{mol}/\text{min}$ )           |
| 66 $\mu\text{l}$ | 0.66        | 5.5                                      | 6                                               |
| 50 $\mu\text{l}$ | 0.5         | 5.1                                      | 5.4                                             |
| 40 $\mu\text{l}$ | 0.4         | 4.8                                      | 4.9                                             |
| 33 $\mu\text{l}$ | 0.33        | 4.5                                      | 4.6                                             |
| 28 $\mu\text{l}$ | 0.28        | 3.9                                      | 4.4                                             |

**Supplementary Figure 5d,  $k_m$  (d).** The  $k_m$  values were determined from Lineweaver-Burk plots for free and immobilized enzyme by using starch concentrations from 3-7 mg/0.5 ml. The assay was performed as described in  $\alpha$ -amylase assay.
